# Supplementary material
Source: PubMed Central journal article supplement (PMC4623570)
Supplement: JCI79860sd.pdf [file JCI79860sd.pdf]

**Supplementary Figure 1:** Cellular binding assay of the B56 $\delta$  P201S SNP found in the EVS database. EGFP-tagged wild-type B56 $\delta$ , B56 $\delta$  P201S, or EGFP alone (-) were ectopically expressed in HEK293 cells. Following EGFP-trapping, the presence of endogenous PP2A A and C subunits in the trapped complexes was examined by immunoblotting (IB). After quantification of the band intensities with Image J, the ratios between EGFP and C, and between EGFP and A signals were determined, and calculated relative to B56 $\delta$  wild-type control. The graphs that show A or C binding abilities displays mean values of 6 independent experiments (all shown).

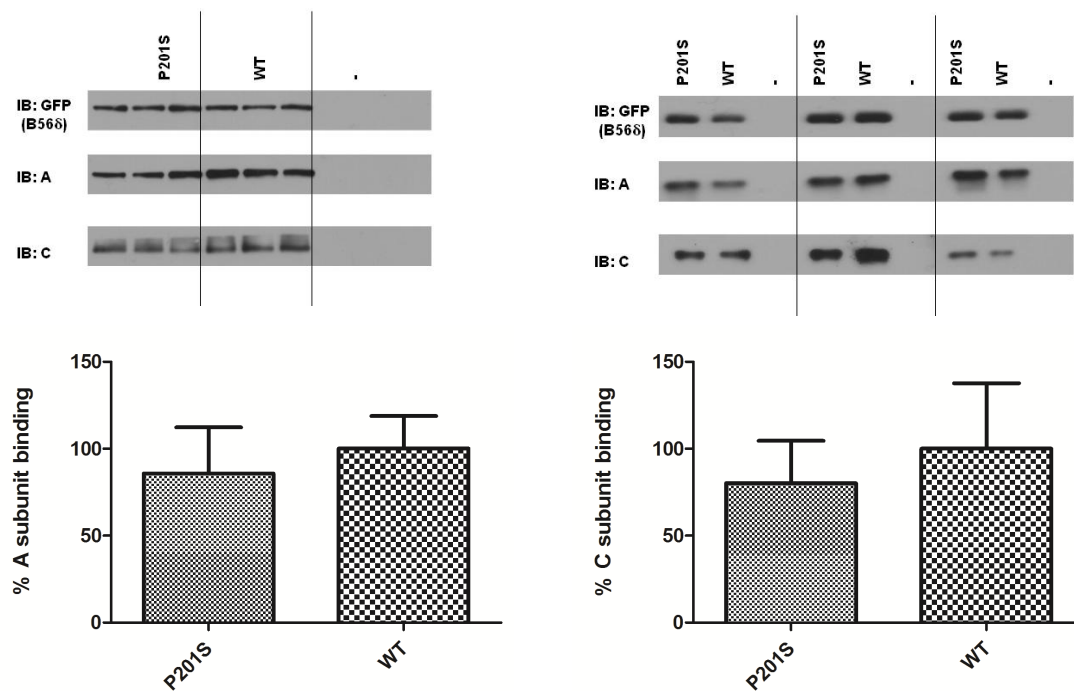

## Supplementary Figure 2: Stability of ID-associated B56 $\delta$ and A $\alpha$ mutants

HEK293 cells were transfected with EGFP-B56 $\delta$  (wild-type), EGFP-B56 $\delta$ -P53S or EGFP-B56 $\delta$ -E198K mutants (upper panels), or with HA-A $\alpha$  (wild-type), HA-A $\alpha$ -R183W or HA-A $\alpha$ -P179L mutants (lower panels), and incubated with 50  $\mu$ M cycloheximide (CHX) for different time points (0h, 10h and 24h). After lysis, the protein extracts were analyzed by immunoblotting (IB) with anti-vinculin, anti-HA or anti-GFP antibodies. Band intensities were quantified using ImageJ software. Relative HA/vinculin or GFP/vinculin levels were calculated from three independent experiments and the mean values  $\pm$  standard deviation plotted in a graph defined by linear regression (and with relative PP2A subunit/vinculin levels at time point 0h designated as 100%).

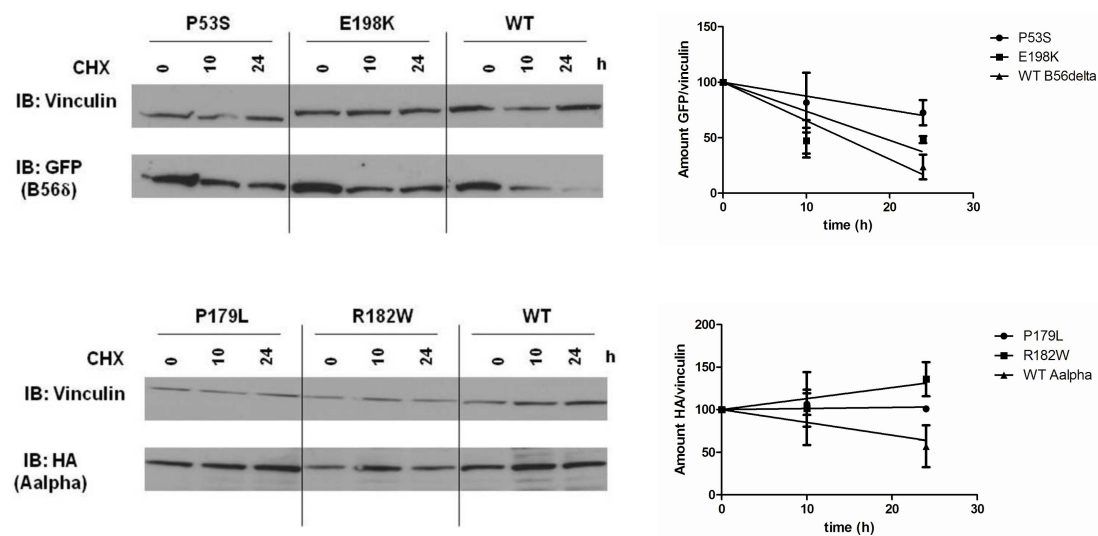

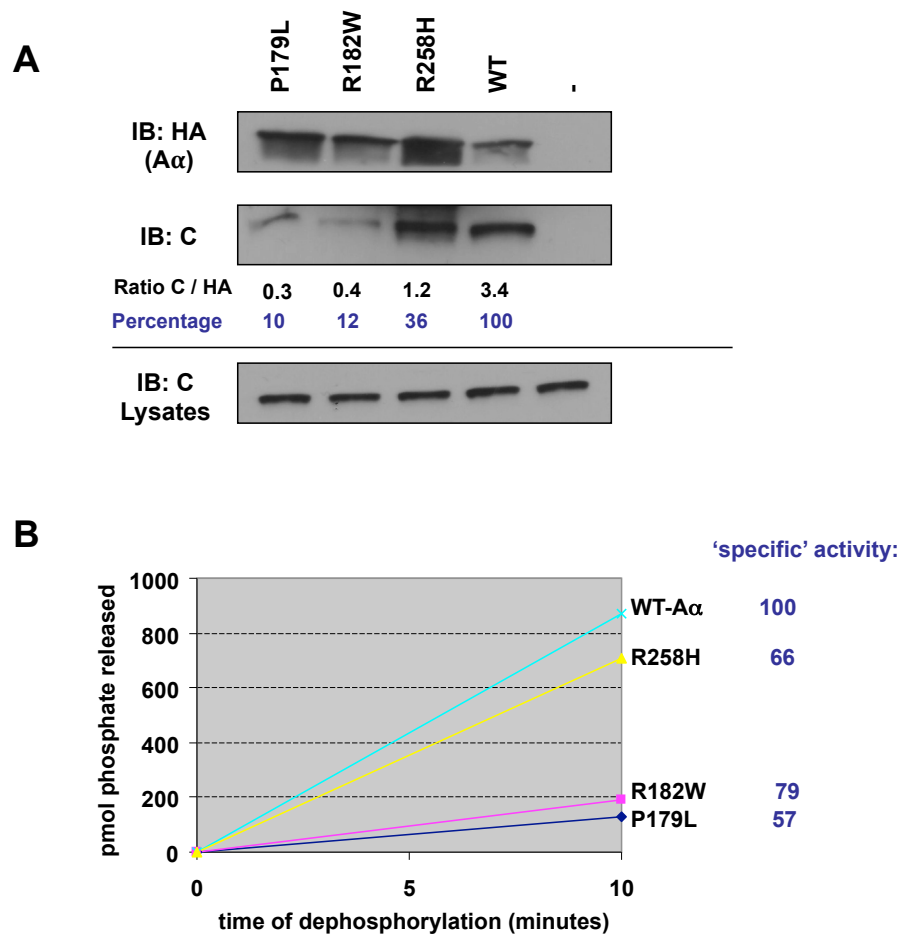

**Supplementary Figure 3:** Reduced specific PP2A C activity in HA-(mutant)A $\alpha$ -C complexes. In panel **A**, binding of C to the HA-tagged (mutant) A subunits is determined (as described in Figure 3A). In panel **B**, the pmole number of released phosphate from the K-R-pT-I-R-R phosphopeptide (350  $\mu$ M in assay) was determined by Malachite Green assay for each of the HA-(mutant)A $\alpha$ -C complexes. The assay was done at 30°C for 10 minutes. Specific C activities were obtained by dividing the absolute amount of pmoles released by the amount of C in the resp. samples, as determined by immunoblotting (IB) and following quantification by Image J. All specific activities were eventually recalculated relative to A $\alpha$  wild-type control (which was set to 100%).

**Supplementary Table 1:** Overview of additional exomic alterations of potential interest.

| Case | Gene                              | Genomic change                             | Prediction / evaluation                                                                   |
|------|-----------------------------------|--------------------------------------------|-------------------------------------------------------------------------------------------|
| 1    | <i>MEP1B</i>                      | <i>De novo</i> missense variant            | Polymorphism                                                                              |
| 2    | -                                 | No other plausible findings                | -                                                                                         |
| 3    | <i>ABCB7D</i>                     | Inherited missense variant                 | Polymorphism                                                                              |
| 4    | <i>COG1</i>                       | Compound heterozygous missense variants    | The phenotype was incompatible with CDG type IIG                                          |
| 5    | <i>OCRL</i>                       | Inherited missense variant                 | The phenotype was incompatible with Lowe syndrome                                         |
| 6    | ?                                 | No information available                   |                                                                                           |
| 7    | <i>TMEM204</i><br><i>SUV420H2</i> | <i>De novo</i> missense variants           | No known disease association                                                              |
| 8    | ?                                 | Unknown – detected by targeted (MIP) assay | -                                                                                         |
| 9    | -                                 | No other plausible findings                | -                                                                                         |
| 10   | -                                 | No other plausible findings                | -                                                                                         |
| 11   | <i>ELMO2</i>                      | <i>De novo</i> missense variant            | No known disease association                                                              |
| 12   | -                                 | No other plausible findings                | -                                                                                         |
| 13   | <i>PKHD1</i>                      | Compound heterozygous missense variants    | The phenotype was incompatible with ARPKD                                                 |
| 14   | <i>LST1</i>                       | <i>De novo</i> missense variant            | No known disease association                                                              |
| 15   | <i>TMEM67</i>                     | Heterozygous inherited splice mutation     | Phenotype was partly reminiscent of a ciliopathy, but a second mutation was not detected. |
| 16   | -                                 | No other plausible findings                | -                                                                                         |

**Supplementary Table 2:** Oligonucleotides used for site-directed mutagenesis

| <b>Primers B56δ mutations</b> |                                                          |
|-------------------------------|----------------------------------------------------------|
| P53S Forward                  | 5'-GTCTCAGCCAT <u>C</u> GTCATCCAAC-3'                    |
| P53S Reverse                  | 5'-GTTGGATGACGAT <u>A</u> TGGCTGAGAC-3'                  |
| E198K Forward                 | 5'-GACCCAGAGAAAGATGAGCCC-3'                              |
| E198K Reverse                 | 5'-GGGCTCATCTTT <u>T</u> CTCTGGGTC-3'                    |
| E200K Forward                 | 5'-GACCCAGAGGAAGATA <u>A</u> AGCCCACCCTGGAAGCTGC-3'      |
| E200K Reverse                 | 5'-GCAGCTTCCAGGGTGGGCTT <u>A</u> TCTTCCTCTGGGTC-3'       |
| P201R Forward                 | 5'-GACCCAGAGGAAGATGAGC <u>G</u> CACCCTGGAAGCTGCTTGGCC-3' |
| P201R Reverse                 | 5'-GGCCAAGCAGCTTCCAGGGTG <u>C</u> GCTCATCTTCCTCTGGGTC-3' |
| P201S Forward                 | 5'-GACCCAGAGGAAGATGAG <u>A</u> GCACCCTGGAAGCTGCTTGGCC-3' |
| P201S Reverse                 | 5'-GGCCAAGCAGCTTCCAGGGTG <u>C</u> TCTCATCTTCCTCTGGGTC-3' |
| W207R Forward                 | 5'-GCCCACCCTGGAAGCTGCT <u>A</u> GGCCACATCTCCAGCTCG-3'    |
| W207R Reverse                 | 5'-CGAGCTGGAGATGTGGCCT <u>A</u> GCAGCTTCCAGGGTGGGC-3'    |
| <b>Primers Aα mutations</b>   |                                                          |
| P179L Forward                 | 5'-GCTCAGATGACACCC <u>G</u> CATGGTGCGGCGGGC-3'           |
| P179L Reverse                 | 5'-GCCCGCCGCACCATG <u>C</u> GGGTGTCATCTGAGC-3'           |
| R182W Forward                 | 5'-ACCCCATGGTG <u>T</u> GGCGGGCCGCA-3'                   |
| R182W Reverse                 | 5'-TGCGGCCCCG <u>C</u> ACACCATGGGGGT-3'                  |
| R258H Forward                 | 5'-AAGACAAGTCCTGGC <u>A</u> CGTCCGCTACATGGT-3'           |
| R258H Reverse                 | 5'-ACCATGTAGCGGACG <u>T</u> GCCAGGACTTGTCTT-3'           |
